# Supplementary material for: Diversity of ABBA Prenyltransferases in Marine Streptomyces sp. CNQ-509: Promiscuous Enzymes for the Biosynthesis of Mixed Terpenoid Compounds
Source: PubMed Central journal article supplement (PMC4684245; doi:10.1371/journal.pone.0143237), 2015-12-14
Supplement: pone.0143237.s001.pdf [file pone.0143237.s001.pdf]

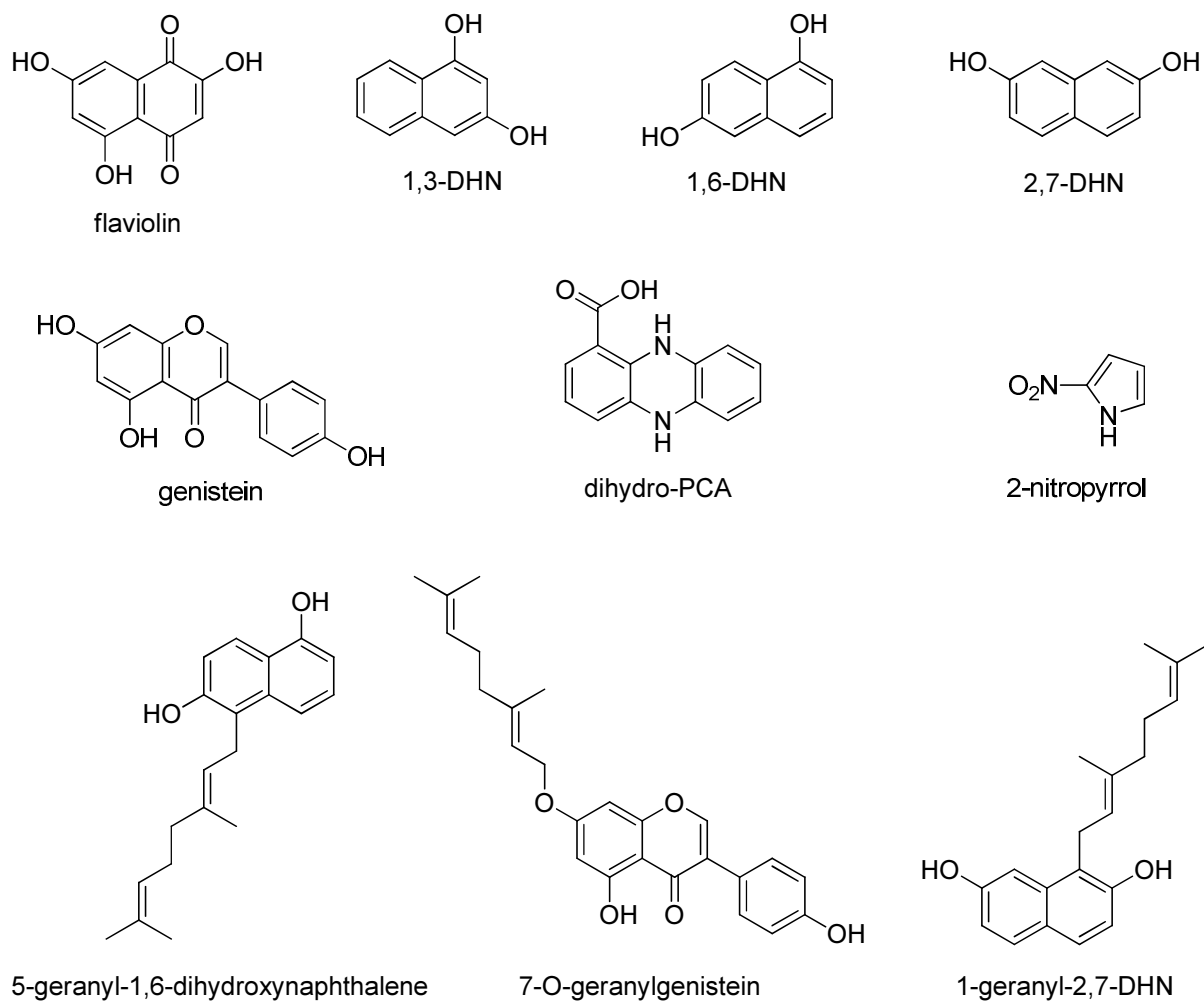

**S1 Fig.** Aromatic substrates used for prenyltransferase assays and predicted products.
