# Supplementary material for: Diversity of ABBA Prenyltransferases in Marine Streptomyces sp. CNQ-509: Promiscuous Enzymes for the Biosynthesis of Mixed Terpenoid Compounds
Source: PubMed Central journal article supplement (PMC4684245; doi:10.1371/journal.pone.0143237), 2015-12-14
Supplement: pone.0143237.s002.pdf [file pone.0143237.s002.pdf]

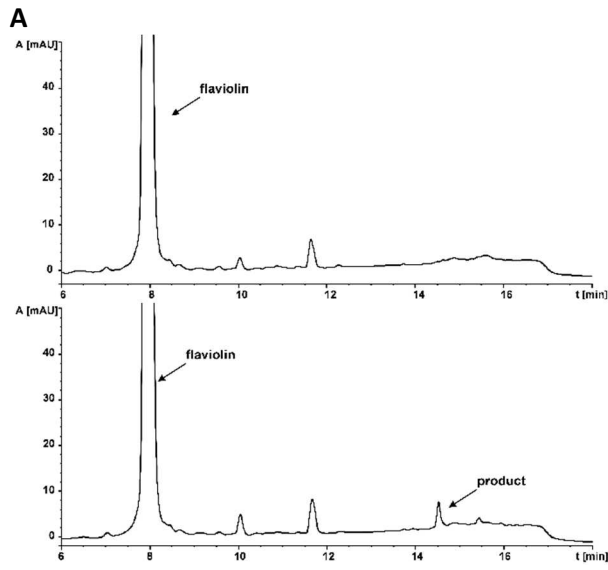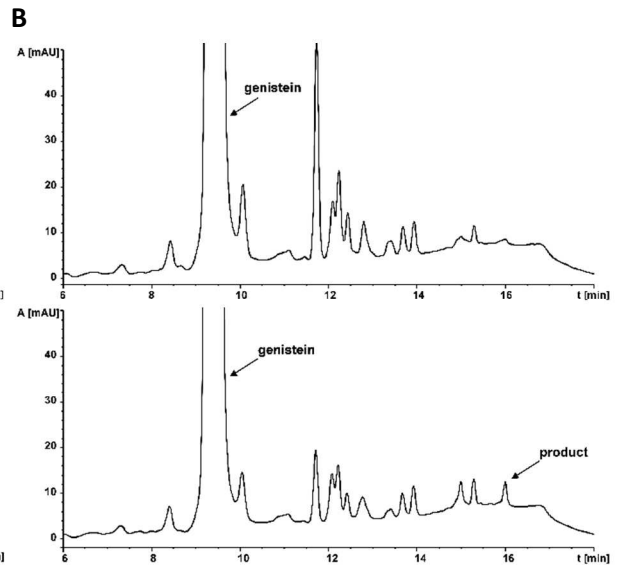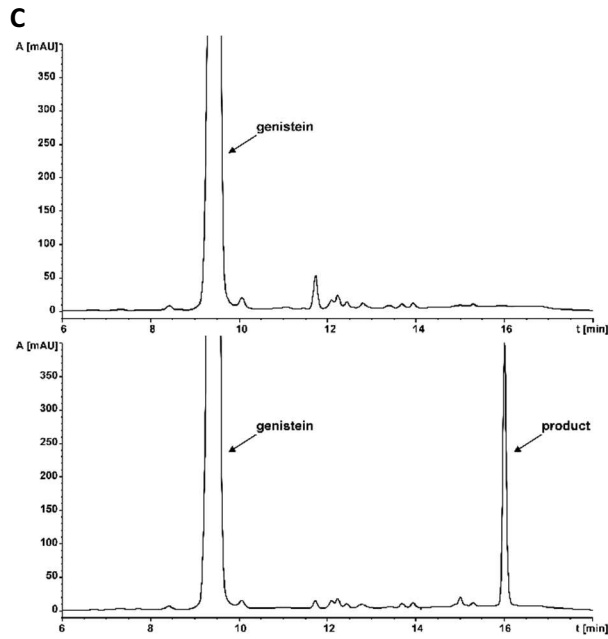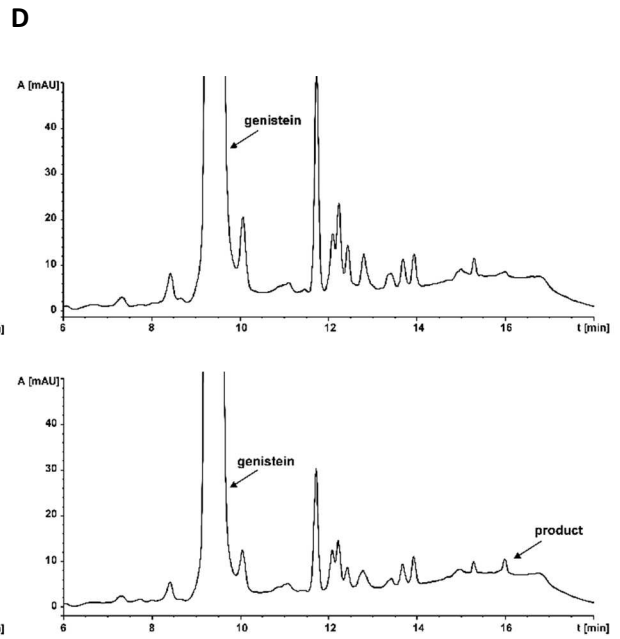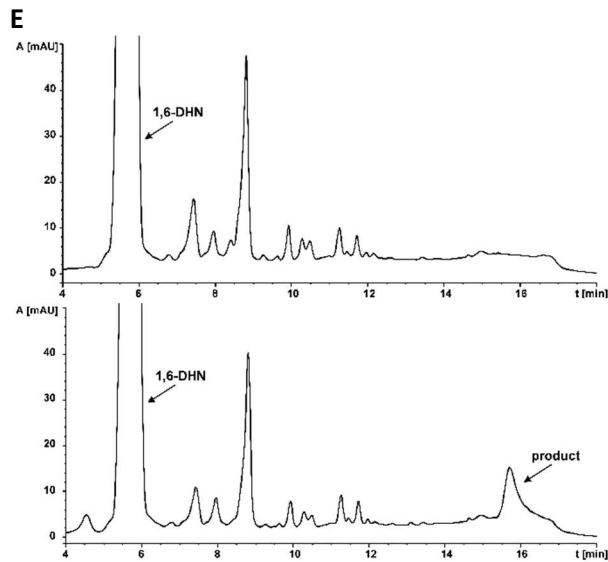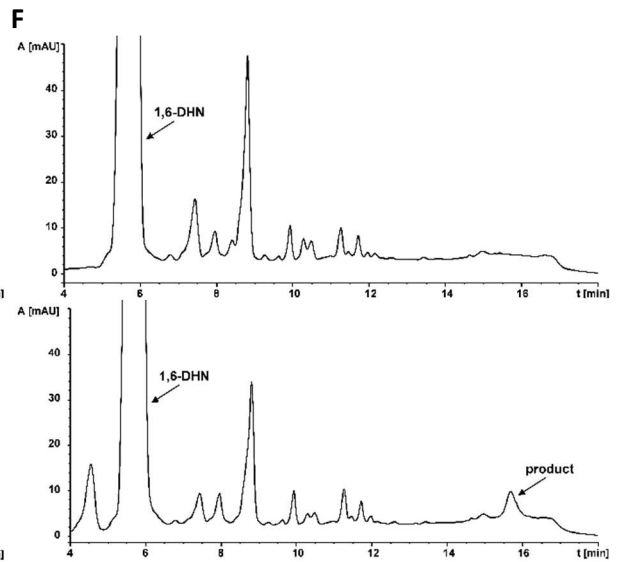

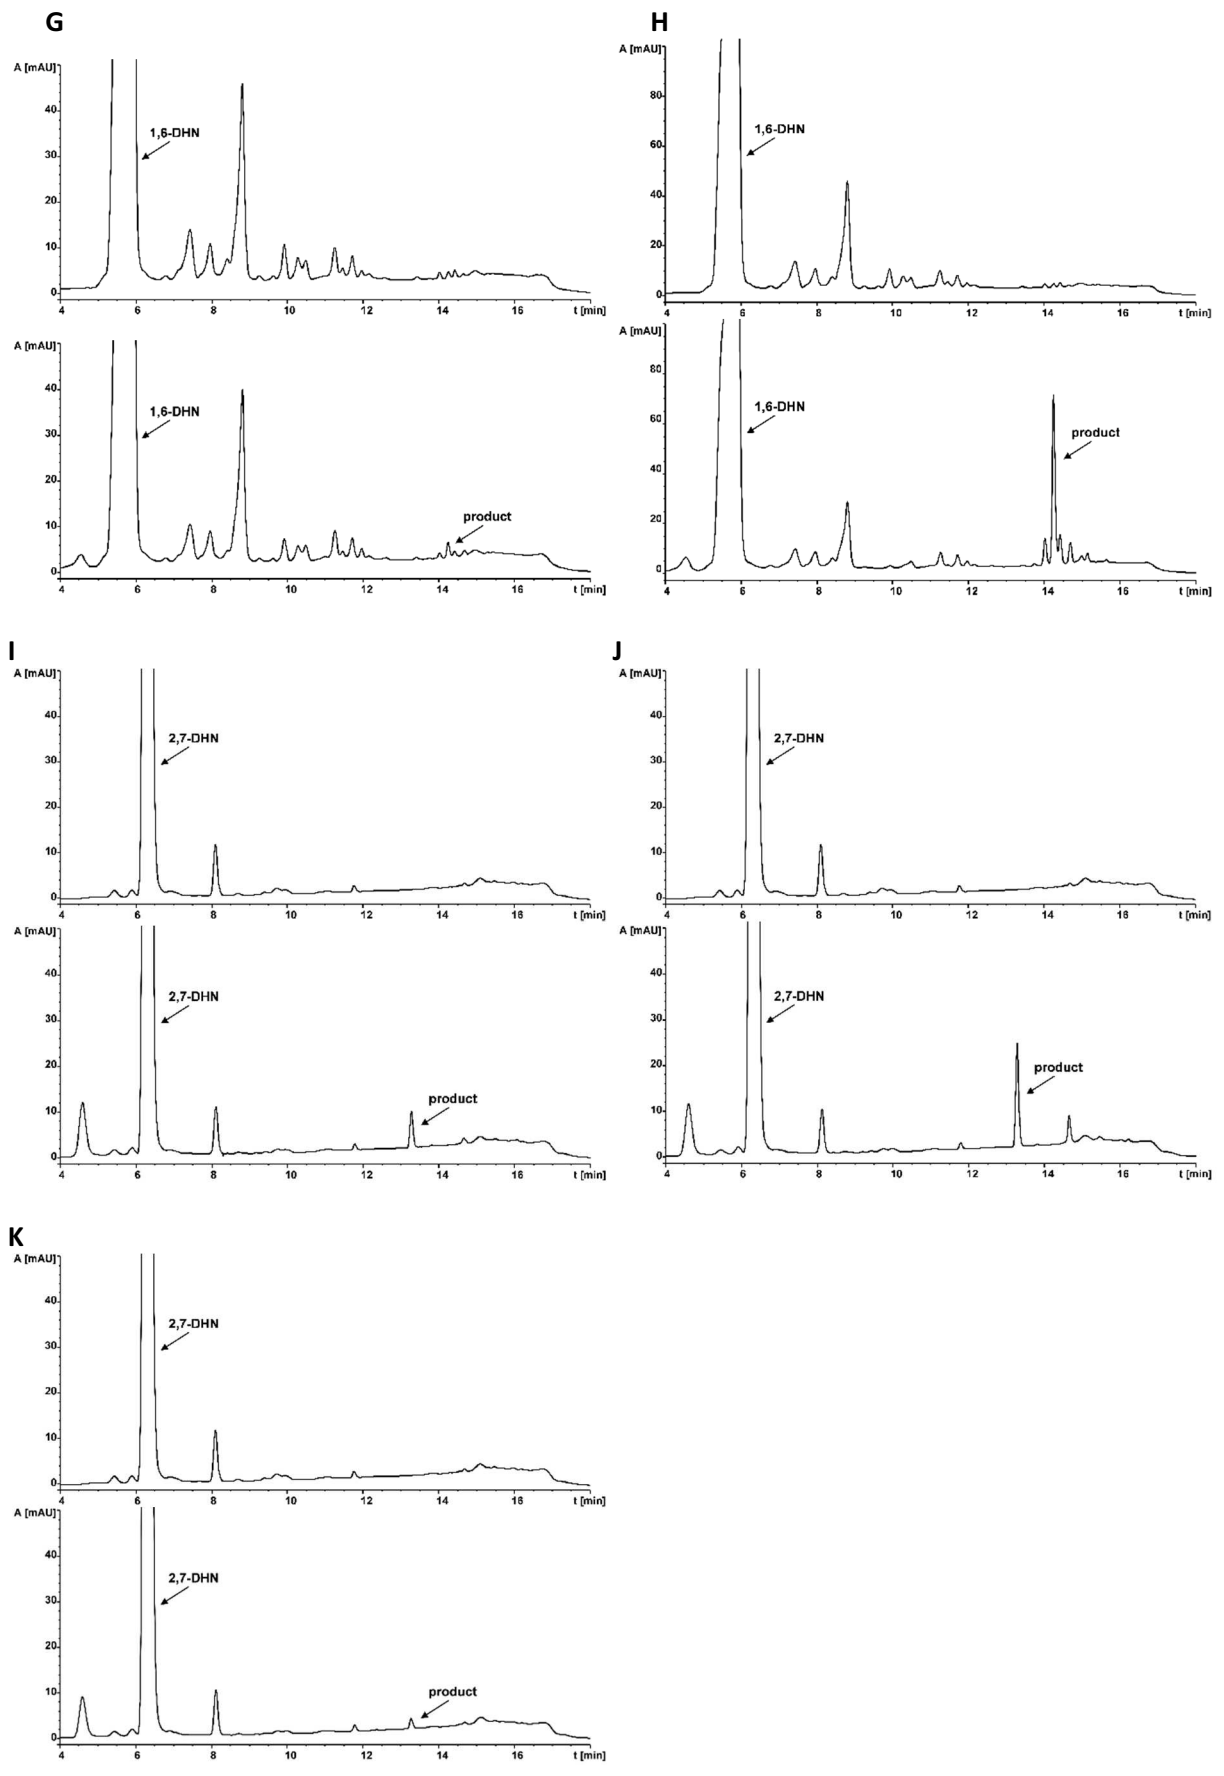

**S2 Fig.** HPLC-UV analysis of prenyltransferase assays **A – K**. Upper chromatograms: assay without enzyme. Lower chromatograms: assay with indicated enzyme. The main product is highlighted with an arrow. **A** reaction of CnqP3, flaviolin and GPP; **B** reaction of CnqP2, genistein and GPP; **C** reaction of CnqP3, genistein and GPP; **D** reaction of CnqP6, genistein and GPP; **E** reaction of CnqP3, 1,6-DHN and DMAPP; **F** reaction of CnqP5, 1,6-DHN and DMAPP; **G** reaction of CnqP2, 1,6-DHN and GPP; **H** reaction of CnqP3, 1,6-DHN and GPP; **I** reaction of CnqP2, 2,7-DHN and GPP; **J** reaction of CnqP3, 2,7-DHN and GPP; **K** reaction of CnqP4, 2,7-DHN and GPP.
