# Supplementary material for: Diversity of ABBA Prenyltransferases in Marine Streptomyces sp. CNQ-509: Promiscuous Enzymes for the Biosynthesis of Mixed Terpenoid Compounds
Source: PubMed Central journal article supplement (PMC4684245; doi:10.1371/journal.pone.0143237), 2015-12-14
Supplement: pone.0143237.s003.pdf [file pone.0143237.s003.pdf]

**A**

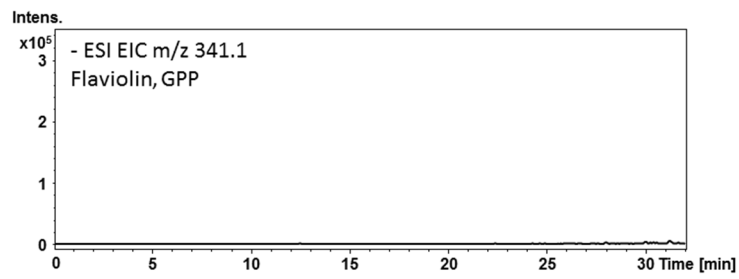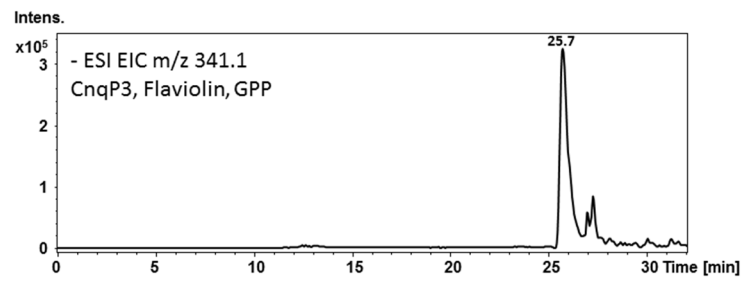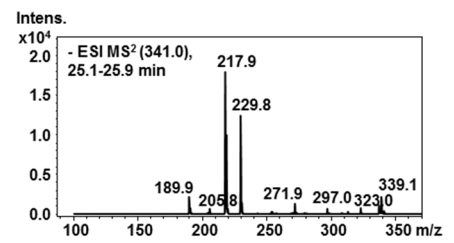

**B**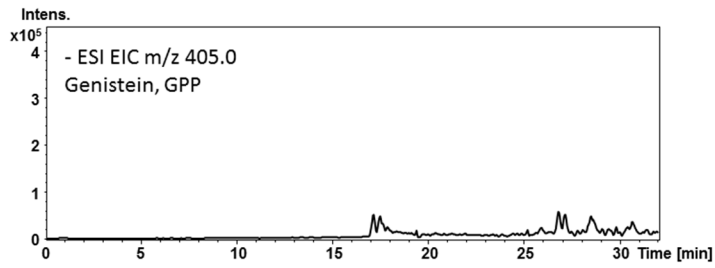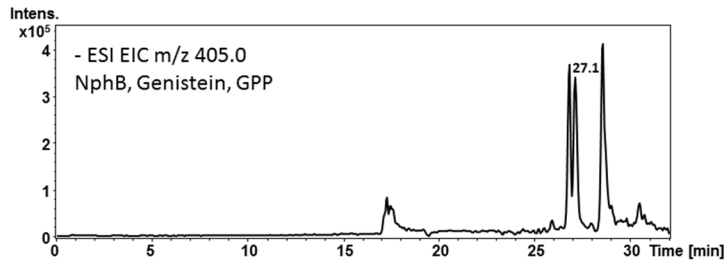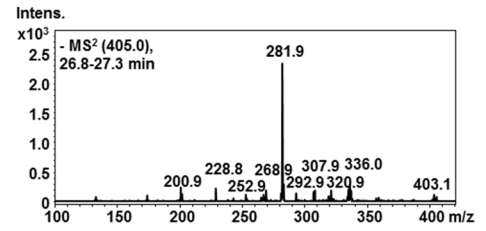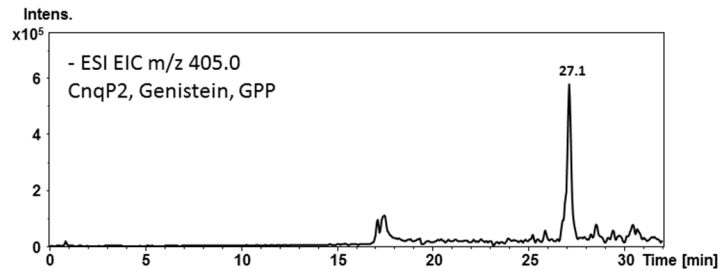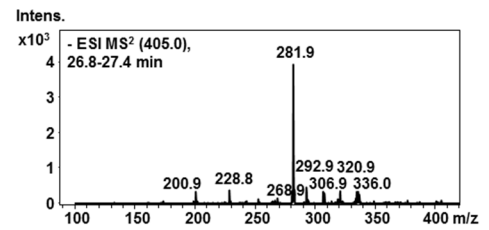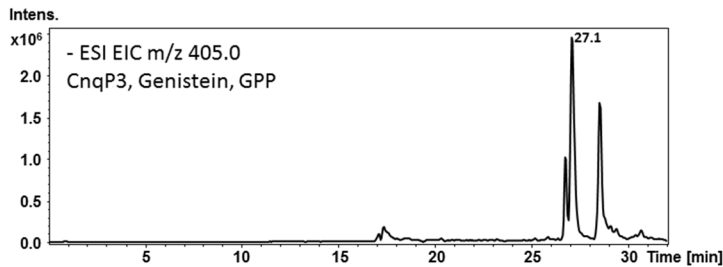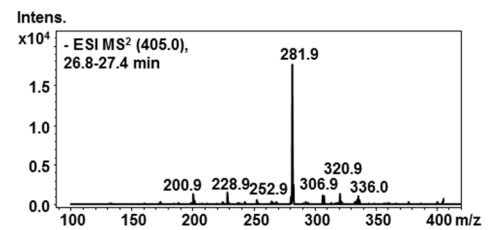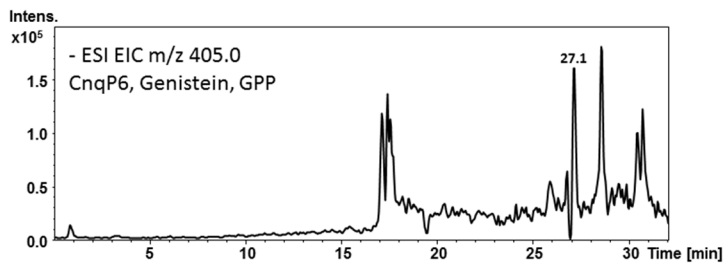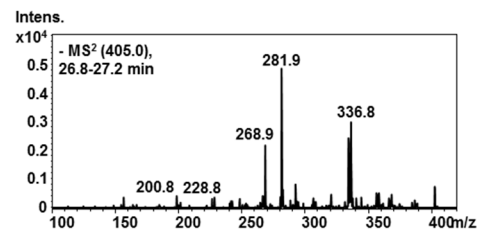

C

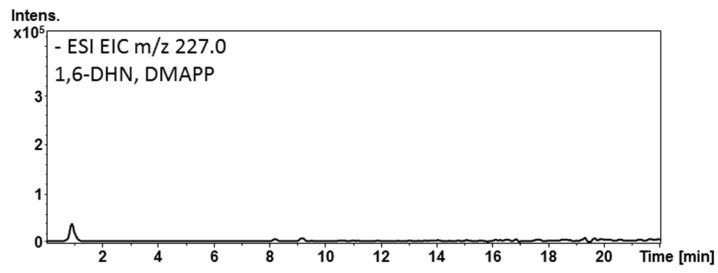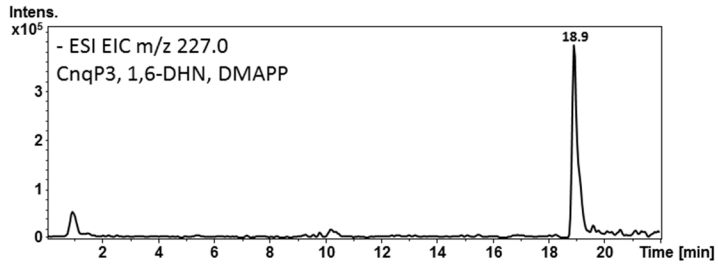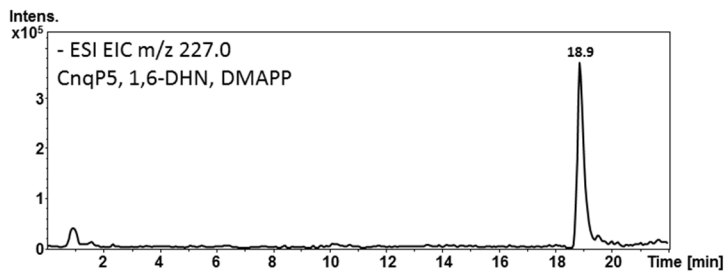

**D**

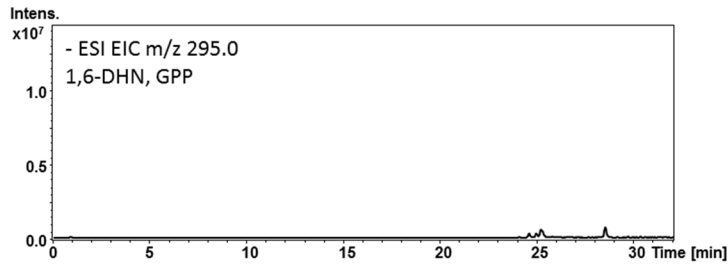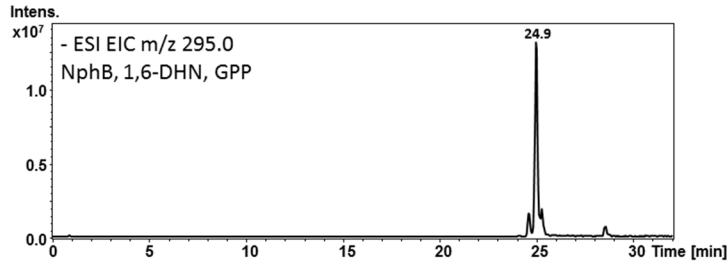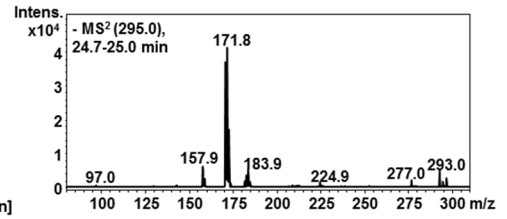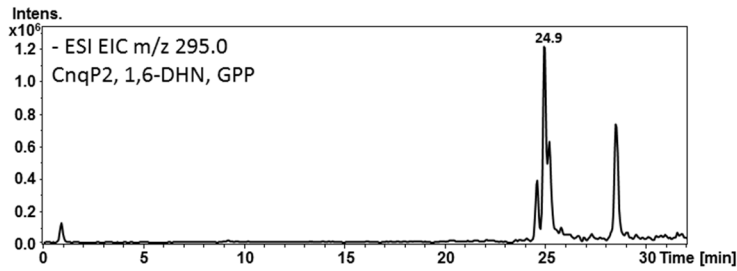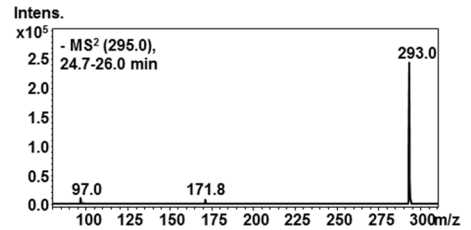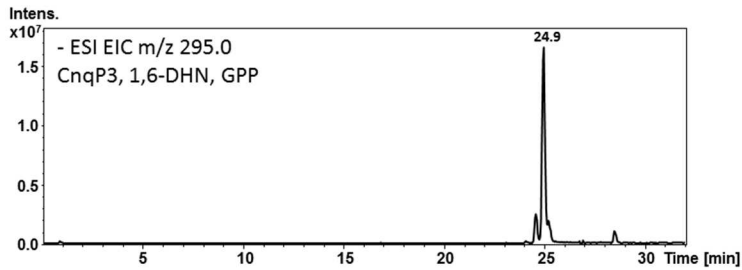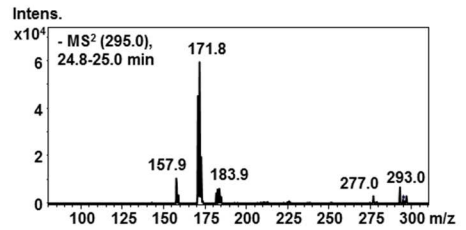

**E**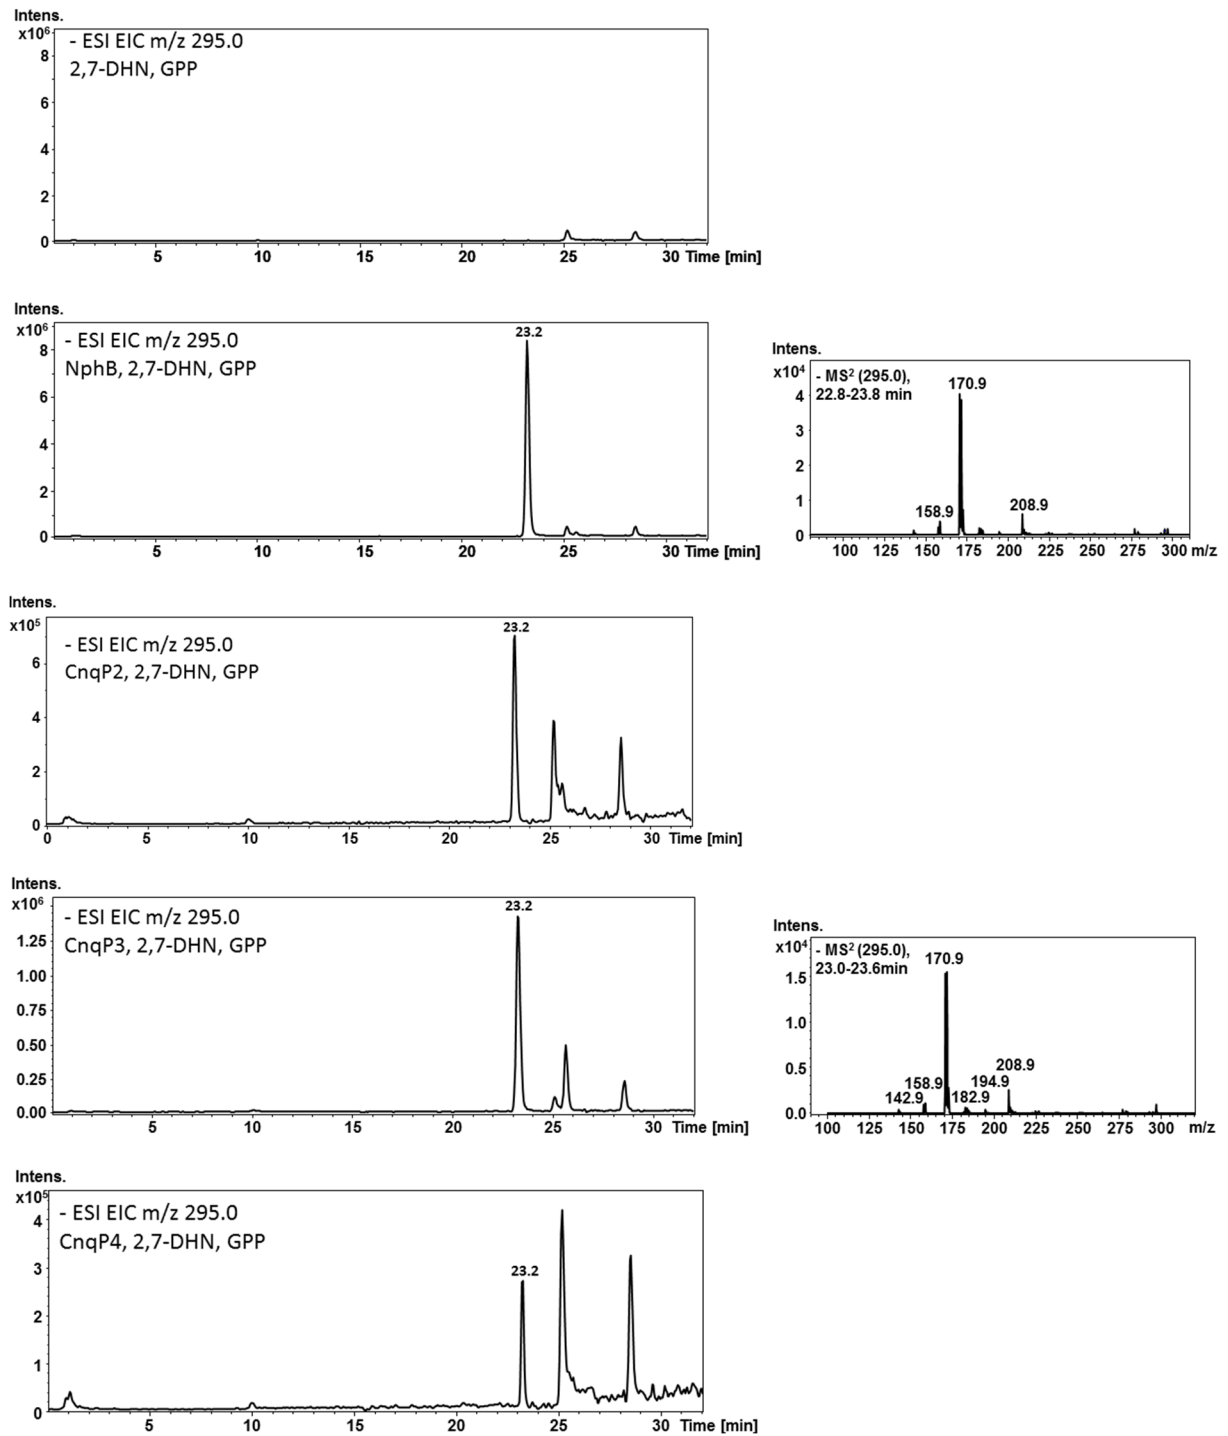

**S3 Fig.** MS analysis of enzymatic products. Extracted ion chromatograms (EICs) and MS/MS spectra. **A** Reaction of flaviolin: Monoprenylated product with GPP,  $m/z$  341.1 [M-H]<sup>-</sup>. **B** Reaction of genistein: Monoprenylated product with GPP,  $m/z$  405.0 [M-H]<sup>-</sup>. **C** Reaction of 1,6-dihydroxy naphthalene (1,6-DHN): Monoprenylated product with DMAPP,  $m/z$  227.0 [M-H]<sup>-</sup>. **D** Reaction of 1,6-dihydroxynaphthalene (1,6-DHN): Monoprenylated product with GPP,  $m/z$  295.0 [M-H]<sup>-</sup>. **E** Reaction of 2,7-dihydroxynaphthalene (2,7-DHN): Monoprenylated product with GPP,  $m/z$  295.0 [M-H]<sup>-</sup>.
