# Supplementary material for: Diversity of ABBA Prenyltransferases in Marine Streptomyces sp. CNQ-509: Promiscuous Enzymes for the Biosynthesis of Mixed Terpenoid Compounds
Source: PubMed Central journal article supplement (PMC4684245; doi:10.1371/journal.pone.0143237), 2015-12-14
Supplement: pone.0143237.s004.pdf [file pone.0143237.s004.pdf]

**S1 Table.** Homologues of the methylerythritol phosphate (MEP) pathway

| Gene        | AA  | Protein homologue                                   | Accession number | Identity / similarity | Proposed function                                  |
|-------------|-----|-----------------------------------------------------|------------------|-----------------------|----------------------------------------------------|
| AA958_27820 | 655 | B105_RS0102225, <i>Streptomyces</i> sp. CNT371      | WP_027740976     | 95 / 97               | deoxyxylulose phosphate (DXP) synthase             |
| AA958_24380 | 635 | B121_RS0122075, <i>Streptomyces</i> sp. CNH099      | WP_027755386     | 93 / 96               |                                                    |
| AA958_26245 | 419 | B105_RS0118250, <i>Streptomyces</i> sp. CNT371      | WP_027743595     | 97 / 98               | DXP reducto isomerase                              |
| AA958_13460 | 269 | B121_RS0109340, <i>Streptomyces</i> sp. CNH099      | WP_027753224     | 96 / 98               | MEP-cytidyl transferase                            |
| AA958_12100 | 321 | I003_RS0122715, <i>Streptomyces</i> sp. CNQ329      | WP_027773621     | 88 / 91               | diphosphocytidyl-ME kinase                         |
| AA958_13455 | 178 | B121_RS0109345, <i>Streptomyces</i> sp. CNH099      | WP_027753225     | 94 / 98               | ME cyclodiphosphate synthase                       |
| AA958_26255 | 384 | B121_RS0119255, <i>Streptomyces</i> sp. CNH099      | WP_027754914     | 98 / 98               | hydroxymethyl-butenyl diphosphate (HMBDP) synthase |
| AA958_24310 | 382 | B121_RS0131790, <i>Streptomyces</i> sp. CNH099      | WP_027756924     | 95 / 98               |                                                    |
| AA958_22700 | 305 | I003_RS0110900, <i>Streptomyces</i> sp. CNQ329      | WP_027771554     | 96 / 98               | HMBDP reductase                                    |
| AA958_24320 | 312 | IO24_RS0138155, <i>Streptomyces</i> flavovariabilis | WP_031144193     | 80 / 91               | HMBDP reductase                                    |
| AA958_18615 | 311 | IO24_RS0138155, <i>Streptomyces</i> flavovariabilis | WP_031144193     | 78 / 87               | HMBDP reductase                                    |
